# Supplementary material for: Cornea organoids from human induced pluripotent stem cells
Source: PubMed Central journal article supplement (PMC5269590; doi:10.1038/srep41286), 2017-01-27
Supplement: srep41286-s1.pdf [file srep41286-s1.pdf]

**Supplementary Data**

**Title: Cornea organoids from human induced pluripotent stem cells**

**James W. Foster<sup>1</sup>, Karl Wahlin<sup>5</sup>, Sheila M. Adams<sup>4</sup>, David E. Birk<sup>4</sup>, Donald J. Zack<sup>3</sup>, \*Shukti**

**Chakravarti<sup>1,2,3</sup>**

Supplementary table 1.

| <i>Gene</i>   | <i>Accession number</i> | <i>Forward Primer</i>                    | <i>Reverse Primer</i>                      | <i>Product size</i> |
|---------------|-------------------------|------------------------------------------|--------------------------------------------|---------------------|
| <i>CDH2</i>   | NM_001792.3             | AAATTGAGCCTGAAGCCAAC                     | GTGGCCACTGTGCTTACTGA                       | 102                 |
| <i>CD34</i>   | NM_001025109            | CTTGGGCATCACTGGCTATT                     | TCCACCGTTTTCCGTGTAAT                       | 97                  |
| <i>PAX6</i>   | NM_001310161            | AAAGCAACAGATGGGCGCAGAC                   | TCTTTGCAGCTTCCGCTTCAGC                     | 238                 |
| <i>ABCG2</i>  | NM_001257386            | TCCACTGCTGTGGCATTAAA                     | CCTGCTTGGAAGGCTCTATG                       | 70                  |
| <i>NP63</i>   | NM_003722.4             | TGAGCCACAGTACACGAACC                     | TGCGCGTGGTCTGTGTTATA                       | 99                  |
| <i>KERA</i>   | NM_007035               | TATTCCTGGAAGGCAAGGTG                     | ACCTGCCTCACACTTCTAGACC                     | 102                 |
| <i>KRT14</i>  | NM_000526.4             | CGGCCTGCTGAGATCAAAGA                     | TCTGCAGAAGGACATTGGCA                       | 106                 |
| <i>COL8A1</i> | NM_001850.4             | AGATGCTGCTCTGCCTTCAC                     | AAGGGAGCTCACACGTTTCAC                      | 93                  |
| <i>KRT12</i>  | NM_000223.3             | CCATTGATGTCTGGCCTCTAC                    | TTTCAGCCAGCATTGGAAA                        | 130                 |
| <i>F11R</i>   | NM_144502               | GAAGAAAAGCCCGAGTAGGC                     | TCGAGAGGAAACTGTTGTGC                       | 91                  |
| <i>S100A4</i> | NM_032034.3             | ATGGAGGAGTTGGCAGTGTC                     | CTGCTTCCCTTGCAGAAAAC                       | 148                 |
| <i>POLR2A</i> | NM_000937.4             | CATCATCCGAGACAATGGTG                     | AACAATGTCCCCATCACACA                       | 115                 |
| <i>ΔNp63</i>  |                         | GAA AAC AAT GCC CAG ACT<br>CAA TTT       | TCT GCG CGT GGT CTG TGT<br>TAT             | 127                 |
| <i>P63α</i>   |                         | ATG TCG AAA TTG CTC AGG<br>GAT TTT CAG A | TGA CCA CCA TCT ATC AGA<br>TTG AGC ATT ACT | 77                  |

*All quantitative PCR reactions were carried out under standard cycling conditions (40 cycles) with a 60°C annealing temperature.*

*P63* Primer sequences were obtained from Cavanagh et. al Experimental eye research, 2008, <http://dx.doi.org/10.1016/j.exer.2007.12.007>

Supplementary table 2

Antibodies used in figure 4

| <i>Target</i>                 | <i>Raised in</i> | <i>Provider</i>          | <i>catalogue number</i> | <i>Incubation concentration</i> |
|-------------------------------|------------------|--------------------------|-------------------------|---------------------------------|
| <i>KERA</i>                   | GT               | Santa-Cruz biotechnology | SC-33244                | 1:200                           |
| <i>COL1A1</i>                 | RB               | Novus                    | NB600-408               | 1:500                           |
| <i>COLVA1</i>                 | RB               | Novus                    | NBP1-19633              | 1:500                           |
| <i>COLLVIII</i>               | RB               | Santa-Cruz biotechnology | sc-134947               | 1:500                           |
| <i>ALDH3A1</i>                | RB               | Abcam                    | ab76976                 | 1:500                           |
| <i>LUM</i>                    | MS               | Santa-Cruz biotechnology | sc-166871               | 1:200                           |
| <i>PLC</i>                    | RAT              | Research Diagnostics     | RDI-PERLECabrt          | 1:500                           |
| <i>P63<math>\alpha</math></i> | RB               | Cell signalling          | #13109                  | 1:500                           |
| <i>KRT12</i>                  | RB               | Abcam                    | AB185627                | 1:200                           |
| <i>KRT14</i>                  | RB               | Abcam                    | Ab181595                | 1:200                           |
| <i>KRT3</i>                   | MS               | Abcam                    | AB77869                 | 1:200                           |

Supplemental Figure 1

A. Raw gels used to generate figure 3. Bands represent amplified product after 40 cycles from qPCR experiments.

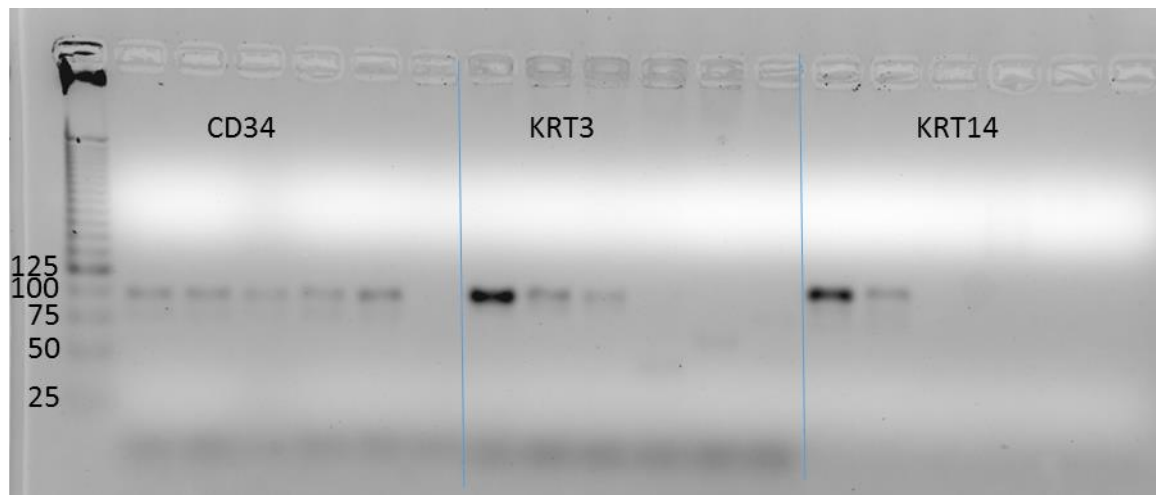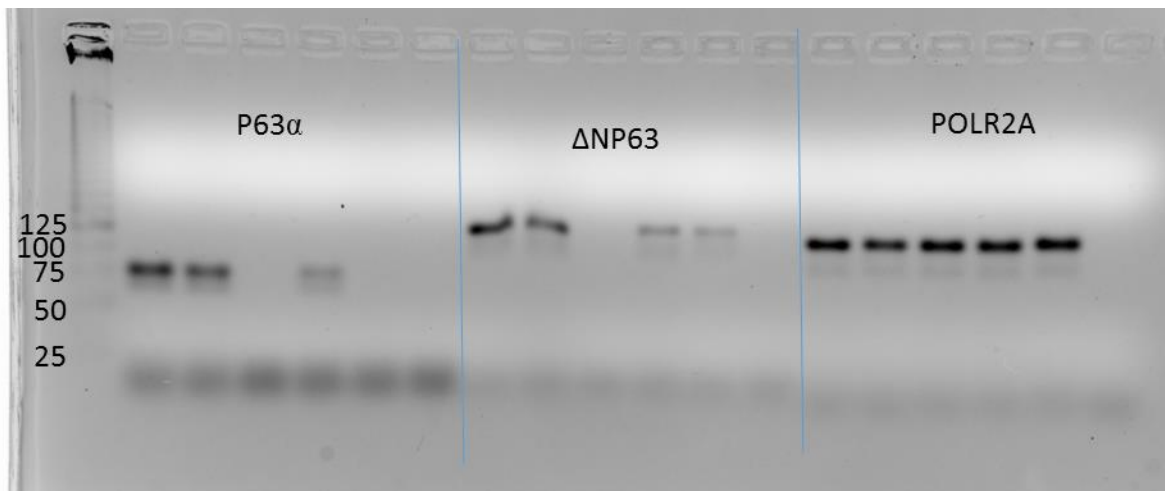

25bp ladder, (Thermo scientific, 10488-095)

Expected sizes:

CD34 – 99

KRT3 – 100

KRT14 – 100

P63 $\alpha$  – 77

$\Delta$ NP63 – 127

## B. Additional markers for corneal differentiation

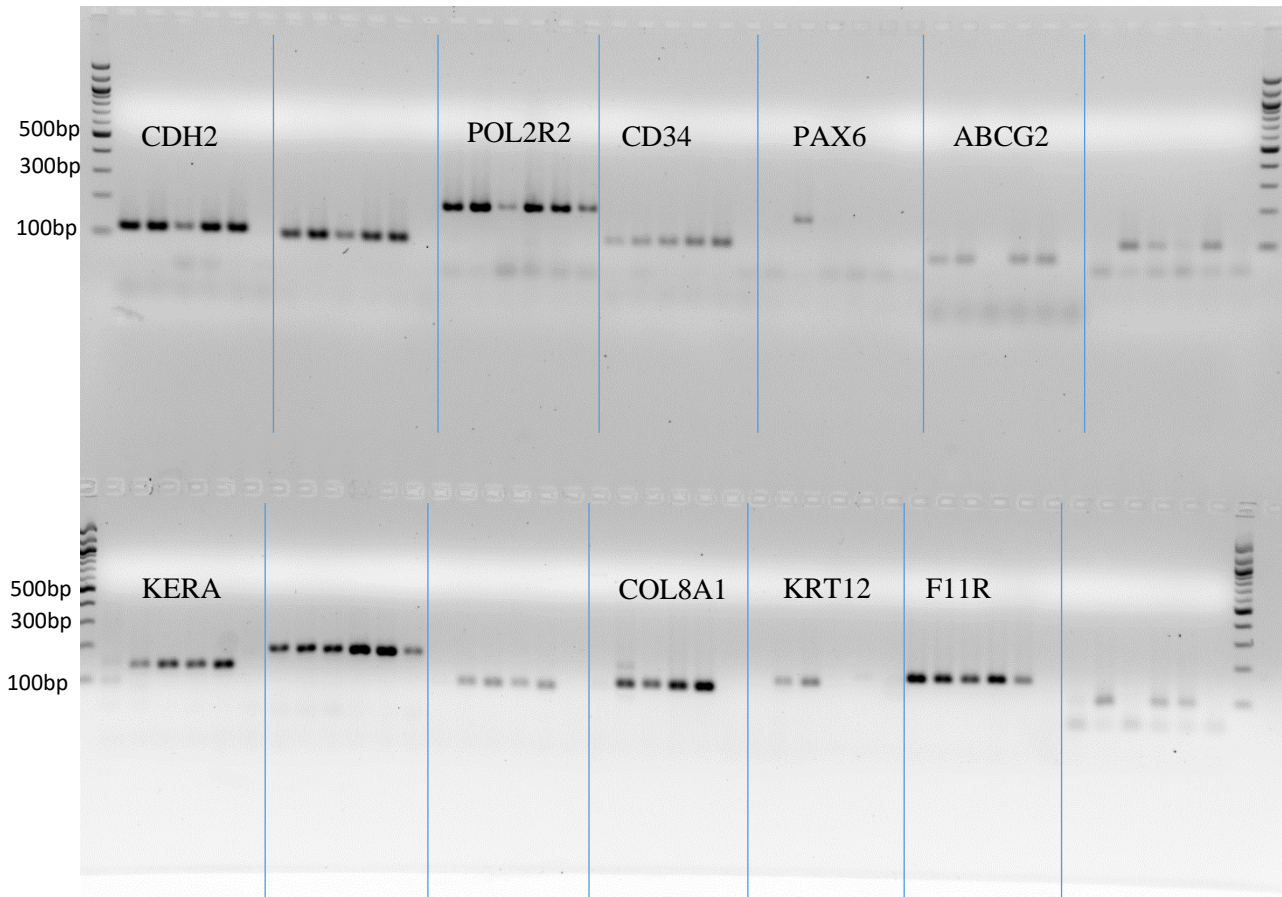

100bp ladder

Expected sizes.

|        |     |
|--------|-----|
| CDH2   | 102 |
| CD34   | 97  |
| PAX6   | 238 |
| ABCG2  | 70  |
| KERA   | 102 |
| COL8A1 | 93  |
| KRT12  | 130 |
| F11R   | 91  |
| POLR2A | 115 |

Unmarked lanes represent unexpected size products or positive RT control samples and have not been included, new sets of primers were used in some cases and are represented in Supplemental figure 1 A.

Supplemental Figure 2

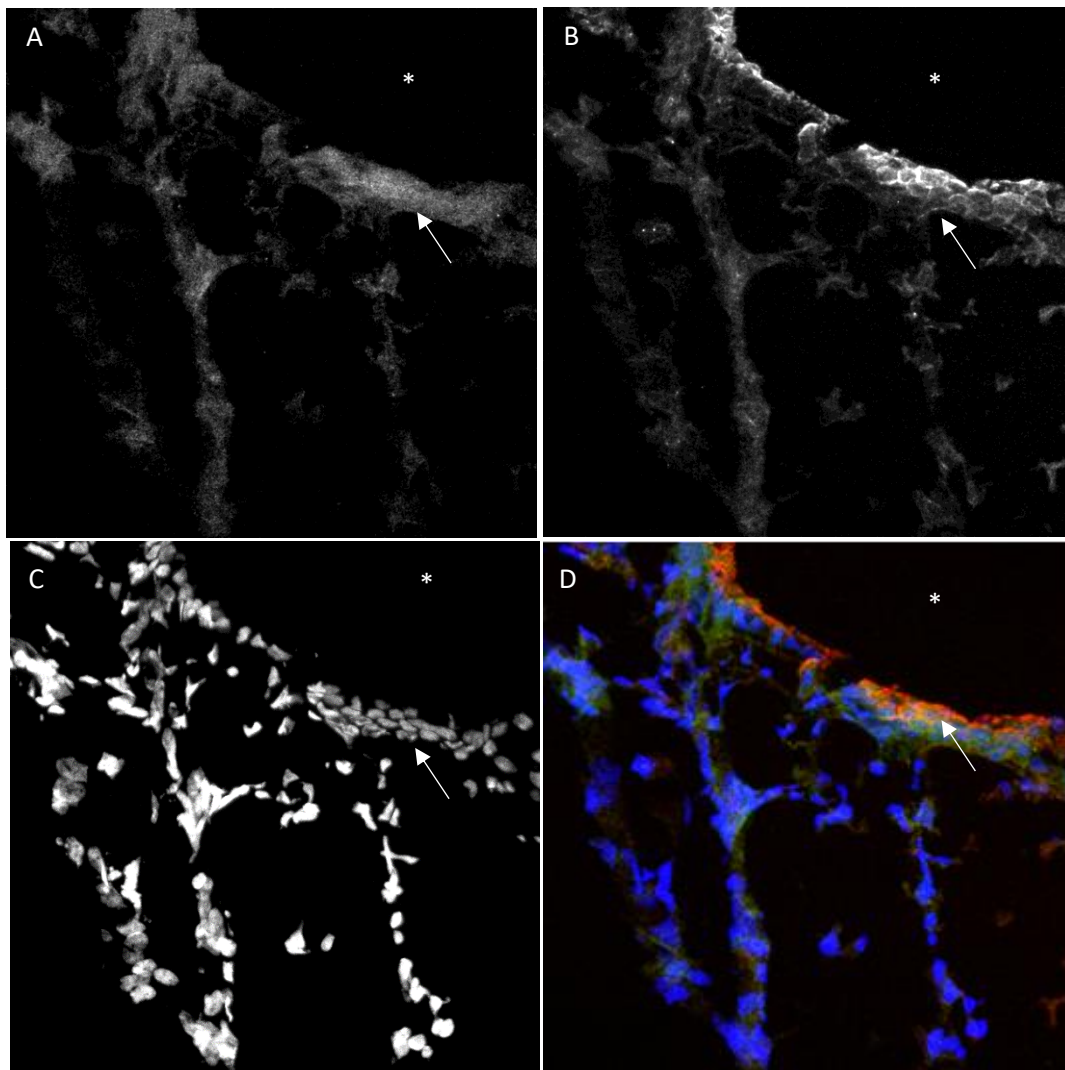

KRT3 staining of corneal organoid showing positive staining of basal layers. A – KRT3, B – F-Actin, C- DNA/Dapi, D – Merge: KRT3 (green), F-actin (Red), DAPI (blue). Note KRT3 staining in the dense, apical cell population, (Arrow).
